# Supplementary material
Source: Springer Nature journal article supplement (https://www.springermedizin.de/resource/supplementary/13256_2011_2084_MOESM3_ESM.pdf/9648944)
Supplement: MOESM3 [file 9648944]

|                                 |                                                                                                                                                                                                                                                            |
|---------------------------------|------------------------------------------------------------------------------------------------------------------------------------------------------------------------------------------------------------------------------------------------------------|
| <b>Drugs</b>                    | <b>Antibiotics</b><br>Rifampicin, sulfonamides, derivatives of penicillin (methicillin..), ciprofloxacin, cotrimoxazole, cephalosporins, ethambutol, isoniazid...                                                                                          |
|                                 | <b>Non steroidal anti-inflammatory drug</b><br>Phenylbutazone, acetylsalicylic acid, diclofenac, ibuprofen, indomethacin, piroxicam, naproxen...                                                                                                           |
|                                 | <b>Antiepileptics</b><br>Phenytoin, carbamazepine, valproate...                                                                                                                                                                                            |
|                                 | <b>Diuretics</b><br>Furosemide, thiazide, amiloride...                                                                                                                                                                                                     |
|                                 | <b>Analgesics</b> Phenacetin, aminopyrine...                                                                                                                                                                                                               |
|                                 | <b>Other drugs</b> Allopurinol, cimetidine, proton pump inhibitors, acyclovir, indinavir, quinine, mesalazine, cocaine, alpha-methyl dopa, azathioprine, cyclosporine...<br><br><b>Other toxics</b> Beryllium, lead, mercury, lithium, sodium phosphate... |
| <b>Infectious causes</b>        | <b>Bacteria</b><br>acute pyelonephritis<br><br>streptococci, corynebacteria (diphtheria), streptococcus pneumoniae, brucella, legionella, salmonella, yersinia, mycobacterium tuberculosis...                                                              |
|                                 | <b>Virus</b><br>cytomegalovirus (CMV), Epstein-Barr virus (EBV), Hanta, measles, Coxsackie, Echovirus, Hepatitis A and C, influenza, herpes simplex, BK (kidney transplant), Human immunodeficiency virus (HIV)...                                         |
|                                 | <b>Spirochetes</b><br>Treponema (syphilis), leptospira...                                                                                                                                                                                                  |
|                                 | <b>Other</b><br>toxoplasma, chlamydia, mycoplasma, rickettsia, Candida...                                                                                                                                                                                  |
| <b>TINU syndrome</b>            | Idiopathic (association of uveitis and tubulo-interstitial nephritis)                                                                                                                                                                                      |
| <b>Systemic disease</b>         | sarcoidosis, Sjögren disease, systemic lupus erythematosus, Wegener granulomatosis, hyper-IgG4 syndrome...                                                                                                                                                 |
| <b>Hematologic malignancies</b> | Myeloma, lymphomas, other lympho-proliferative disease...                                                                                                                                                                                                  |
